# Supplementary material
Source: PubMed Central journal article supplement (PMC5553955)
Supplement: supp_the2016-0252_onco12135-sup-0001-suppinfo01.pdf [file supp_the2016-0252_onco12135-sup-0001-suppinfo01.pdf]

Supplemental Table for:  
The NCI Community Cancer Centers Program (NCCCP): Sustaining Quality and Reducing Disparities in Guideline-Concordant Breast and Colon Cancer Care  
Kathleen Castro et al.

**Table S1. Patient Characteristics by Breast and Colon Cancer Quality Measures**

| Characteristic                          | <i>Breast Cancer</i>      |                       | <i>Quality Measure:</i>   |            | <i>Quality Measure:</i> |       | <i>Colon Cancer</i> |      | <i>Quality Measure:</i> |      |
|-----------------------------------------|---------------------------|-----------------------|---------------------------|------------|-------------------------|-------|---------------------|------|-------------------------|------|
|                                         | <i>BCS<sup>a, b</sup></i> | <i>HT<sup>b</sup></i> | <i>MAC<sup>a, b</sup></i> | <i>ACT</i> | <i>12RLN</i>            |       |                     |      |                         |      |
|                                         | (N=5,485)                 | (N=7,049)             | (N=1,359)                 | (N=1,206)  | (N=4,340)               |       |                     |      |                         |      |
|                                         | No.                       | %                     | No.                       | %          | No.                     | %     | No.                 | %    | No.                     | %    |
| <b><i>Time Period</i></b>               |                           |                       |                           |            |                         |       |                     |      |                         |      |
| Pre-RQRS                                | 1,506                     | 27.5                  | 1,576                     | 22.4       | 331                     | 24.4  | 311                 | 25.8 | 1,203                   | 27.7 |
| Early RQRS                              | 2,424                     | 44.2                  | 3,261                     | 46.3       | 593                     | 43.6  | 519                 | 43.0 | 1,811                   | 41.7 |
| Later RQRS                              | 1,555                     | 28.4                  | 2,212                     | 31.4       | 435                     | 32.0  | 376                 | 31.2 | 1,326                   | 30.6 |
| <b><i>Patient Race</i></b>              |                           |                       |                           |            |                         |       |                     |      |                         |      |
| White                                   | 4,719                     | 86.1                  | 6,258                     | 89.0       | 1,078                   | 79.5  | 1,002               | 83.4 | 3,703                   | 85.6 |
| Non-White                               | 759                       | 13.9                  | 770                       | 11.0       | 278                     | 20.5  | 200                 | 16.6 | 625                     | 14.4 |
| <b><i>Patient Sex</i></b>               |                           |                       |                           |            |                         |       |                     |      |                         |      |
| Male                                    | 0                         | 0.0                   | 0                         | 0.0        | 0                       | 0.0   | 647                 | 53.6 | 2,126                   | 49.0 |
| Female                                  | 5,485                     | 100.0                 | 7,049                     | 100.0      | 1,359                   | 100.0 | 559                 | 46.4 | 2,214                   | 51.0 |
| <b><i>Primary Patient Insurance</i></b> |                           |                       |                           |            |                         |       |                     |      |                         |      |
| Medicare                                | 920                       | 17.1                  | 2,298                     | 33.2       | 185                     | 13.7  | 520                 | 43.7 | 2,570                   | 59.4 |
| Medicaid                                | 294                       | 5.5                   | 386                       | 5.6        | 121                     | 9.0   | 41                  | 3.4  | 95                      | 2.2  |
| Private pay                             | 3,058                     | 56.8                  | 3,085                     | 44.5       | 772                     | 57.3  | 405                 | 34.0 | 1,063                   | 24.6 |
| Insured, NOS                            | 1,018                     | 18.9                  | 1,040                     | 15.0       | 237                     | 17.6  | 178                 | 15.0 | 499                     | 11.5 |
| Not insured                             | 98                        | 1.8                   | 116                       | 1.7        | 32                      | 2.4   | 46                  | 3.9  | 96                      | 2.2  |
| <b><i>Patient Age Group</i></b>         |                           |                       |                           |            |                         |       |                     |      |                         |      |
| Under 50 years                          | 1,392                     | 25.4                  | 1,698                     | 24.1       | 503                     | 37.0  | 175                 | 14.5 | 352                     | 8.1  |
| 50 to 59 years                          | 2,082                     | 38.0                  | 1,901                     | 27.0       | 468                     | 34.4  | 308                 | 25.5 | 753                     | 17.4 |
| 60 to 69 years                          | 2,011                     | 36.7                  | 1,782                     | 25.3       | 388                     | 28.6  | 351                 | 29.1 | 1,040                   | 24.0 |

Supplemental Table for:

The NCI Community Cancer Centers Program (NCCCP): Sustaining Quality and Reducing Disparities in Guideline-Concordant Breast and Colon Cancer Care

Kathleen Castro et al.

|                   |     |     |       |      |     |     |     |      |       |      |
|-------------------|-----|-----|-------|------|-----|-----|-----|------|-------|------|
| 70 years and over | N/A | N/A | 1,668 | 23.7 | N/A | N/A | 372 | 30.8 | 2,195 | 50.6 |
|-------------------|-----|-----|-------|------|-----|-----|-----|------|-------|------|

<sup>a</sup> The BCS and MAC quality measures include patients under age 70; therefore, the  $\geq 70$  age category is not applicable for these quality measures.

<sup>b</sup> Male patients are excluded from the BCS, HT, and MAC quality measures.
